# Supplementary material for: The Effect of Anions and pH on the Activity and Selectivity of an Annealed Polycrystalline Au Film Electrode in the Oxygen Reduction Reaction‐Revisited
Source: PubMed Central journal article supplement — Chemphyschem. 2019 Dec 2;20(24):3276–88. doi: 10.1002/cphc.201900960 (PMC6973112; doi:10.1002/cphc.201900960), 2019-12-02
Supplement: CPHC-20-3276-s001.pdf [file CPHC-20-3276-s001.pdf]

# CHEMPHYSICHEM

## Supporting Information

© Copyright Wiley-VCH Verlag GmbH & Co. KGaA, 69451 Weinheim, 2019

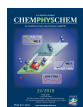

### **The Effect of Anions and pH on the Activity and Selectivity of an Annealed Polycrystalline Au Film Electrode in the Oxygen Reduction Reaction-Revisited**

Zenonas Jusys and R. Jürgen Behm\*©2019 The Authors. Published by Wiley-VCH Verlag GmbH & Co. KGaA.

This is an open access article under the terms of the Creative Commons Attribution Non-Commercial License, which permits use, distribution and reproduction in any medium, provided the original work is properly cited and is not used for commercial purposes. An invited contribution to a Special Collection on Electrocatalysis

**The Effect of Anions and pH on the Activity and Selectivity of an Annealed Polycrystalline Au Film Electrode in the Oxygen Reduction Reaction - Revisited**

Z. Jusys and R.J. Behm

*Institute of Surface Chemistry and Catalysis, Ulm University,*

*Albert-Einstein-Allee 47, D-89081 Ulm, Germany*

## Morphology of the Au Film Electrode

Secondary Electron Microscopy (SEM) characterization of an annealed Au film electrode shows homogeneously distributed nanocrystallites (Fig. S1a). Statistical evaluation yields an average grain size of around 200 nm (Fig. S1b). It should be noted, that the Au particle grain size can affect the spectral features of interfacial water.<sup>[1;2]</sup>

As an additional surface structure sensitive probe, we employed the underpotential deposition of lead (Pb-upd), which had been employed earlier for the electrochemical characterization of the surface structure of annealed gold films.<sup>[3-6]</sup> The sharp spikes for Pb-upd at ca. 0.0 V (Fig. S1c) are comparable with the equally sharp Pb-upd peaks observed for stepped Au single crystal electrodes showing (311), (221), (322) and (544) orientations as examples for the (111)-(110) zone, and (755), (533) and (211) orientations as examples for the (100)-(111) zone.<sup>[5]</sup> Overall, the voltammetric profiles do not allow an unambiguous structural assignment. In particular, they are not characteristic for (100) oriental facets as dominant structural element.

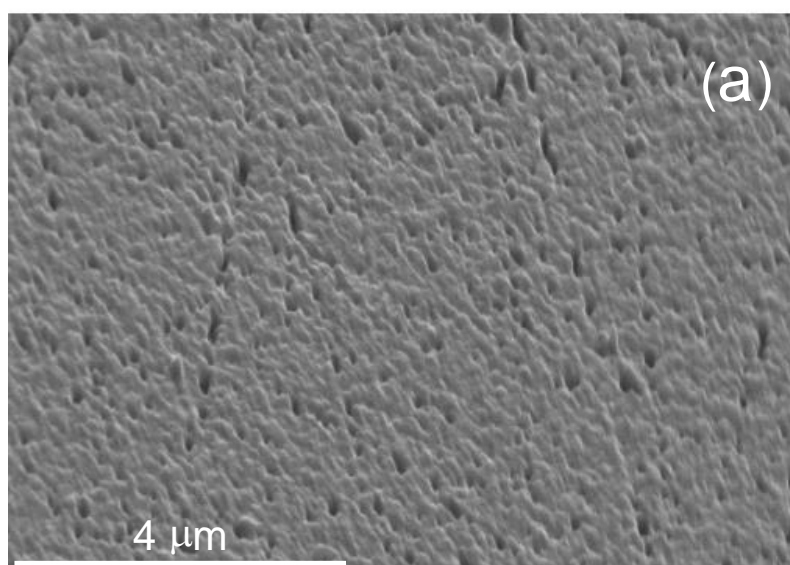

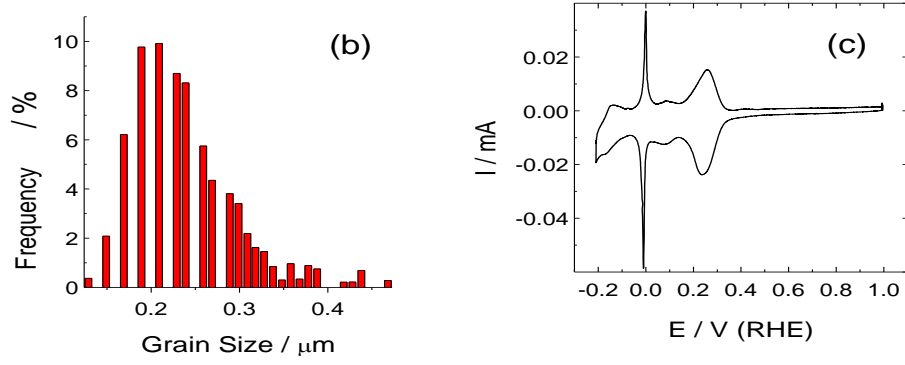

**Figure S1** (a) SEM image of the morphology of an annealed Au film electrolessly deposited on a Si prism (magnification 50000); (b) statistical distribution of the grain size; (c) Pb-up in 1.0 M  $\text{HClO}_4$  solution containing 1.0 mM of  $\text{Pb}^{2+}$ , potential scan rate  $10 \text{ mV s}^{-1}$ , electrolyte flow rate ca.  $40 \mu\text{l s}^{-1}$ .

**Potential-dependent ATR-FTIR Spectra**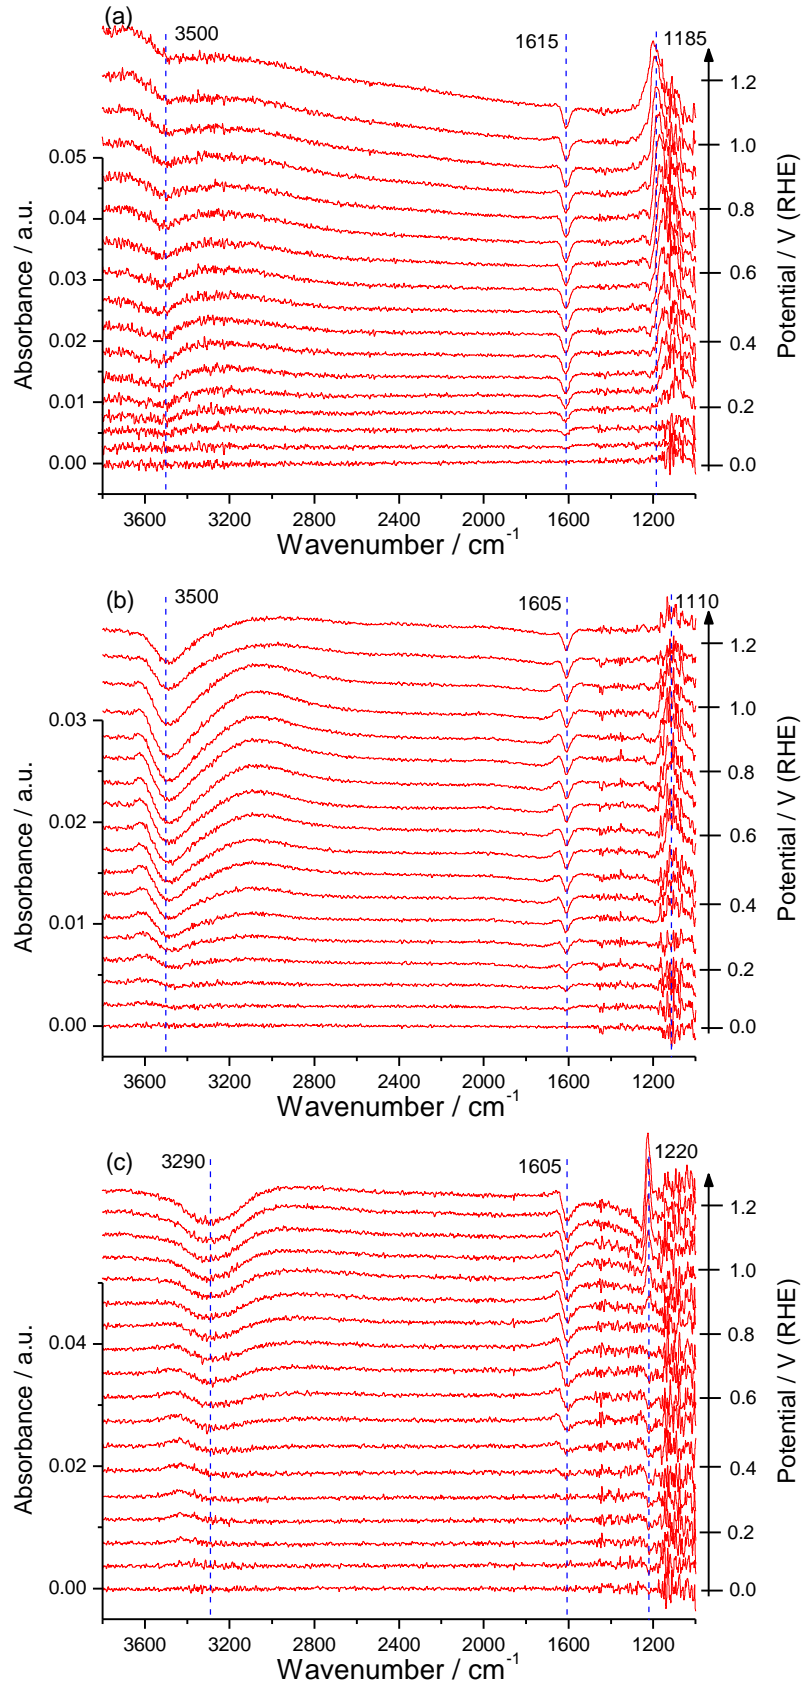

**Figure S2** Selected potential-dependent ATR-FTIR spectra recorded during a positive-going potentiodynamic scan in different O<sub>2</sub>-free electrolytes from 0.0 V to 1.2 V (potential scan rate 10 mV s<sup>-1</sup>, electrolyte flow rate ca. 40 μl s<sup>-1</sup>), similar as in Figures 4a, 5a, 6a, but using background spectra at 0.0 V in O<sub>2</sub>-free supporting electrolyte as reference (spectral resolution 4 cm<sup>-1</sup>, time resolution 1 s<sup>-1</sup>, for clarity each 10<sup>th</sup> spectrum is shown). a) 0.5 M sulfuric acid solution, b) 1.0 M perchloric acid solution, c) 1.0 M sodium hydroxide solution.

### Potentiostatic ORR Current Transients

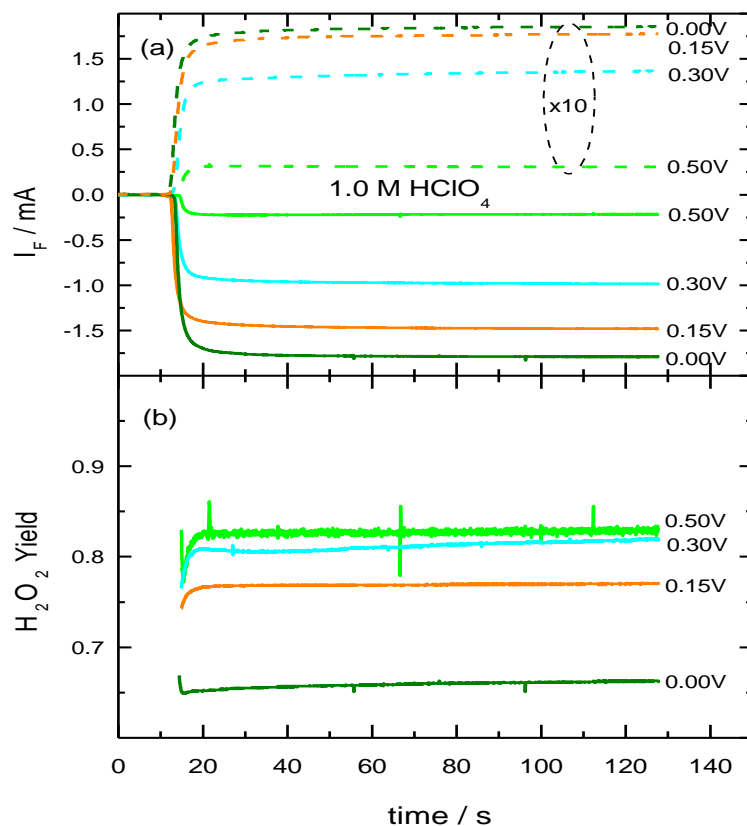

**Figure S3** Potentiostatic current transients of a) the ORR and the HPOR and b) the resulting relative H<sub>2</sub>O<sub>2</sub> yield in O<sub>2</sub>-saturated perchloric acid base electrolyte on the annealed Au film electrode at different potentials (1.0 M HClO<sub>4</sub>, electrolyte flow rate ca. 40  $\mu\text{l s}^{-1}$ ). The current transients were recorded upon switching from the O<sub>2</sub>-free supporting electrolyte to O<sub>2</sub>-saturated electrolyte at constant potential.

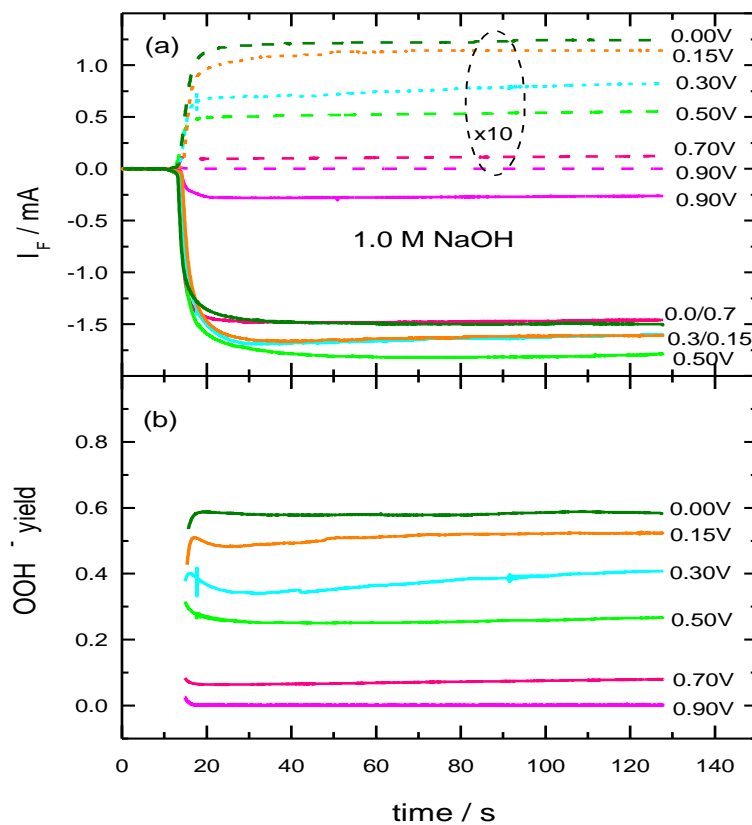

**Figure S4** Potentiostatic current transients of a) the ORR and the HPOR and b) the resulting relative  $\text{H}_2\text{O}_2$  yield in  $\text{O}_2$ -saturated alkaline base electrolyte on the annealed Au film electrode at different potentials (1.0 M NaOH, electrolyte flow rate ca.  $40 \mu\text{l s}^{-1}$ ). The current transients were recorded upon switching from the  $\text{O}_2$ -free supporting electrolyte to  $\text{O}_2$ -saturated electrolyte at constant potential.



## Reference List

- [1] N. Garcia-Araez, P. Rodriguez, V. Navarro, H.J. Bakker, M.T.M. Koper, *J. Phys. Chem. C* **2011**, *115*, 21249-21257.
- [2] N. Garcia-Araez, P. Rodriguez, H.J. Bakker, M.T.M. Koper, *J. Phys. Chem. C* **2012**, *116*, 4786-4792.
- [3] K. Engelsmann, W.J. Lorenz, E. Schmidt, *J. Electroanal. Chem. Interfac. Electrochem.* **1980**, *114*, 1-10.
- [4] A. Hamelin, A. Katayama, *J. Electroanal. Chem. Interfac. Electrochem.* **1981**, *117*, 221-232.
- [5] A. Hamelin, J. Lipkowski, *J. Electroanal. Chem. Interfac. Electrochem.* **1984**, *171*, 317-330.
- [6] J. Hernandez, J. Solla-Gullón, E. Herrero, *J. Electroanal. Chem.* **2004**, *574*, 185-196.
